# Supplementary material for: Protein Tyrosine Phosphatase 1B Inhibitors from the Stems of Akebia quinata
Source: PubMed Central journal article supplement (PMC6273847; doi:10.3390/molecules21081091), 2016-08-19
Supplement: molecules-21-01091-s001.pdf [file molecules-21-01091-s001.pdf]

# Supplementary Materials: Protein Tyrosine Phosphatase 1B Inhibitors from the Stems of *Akebia quinata*

Jin-Pyo An, Thi Kim Quy Ha, Jinwoong Kim, Tae Oh Cho and Won Keun Oh

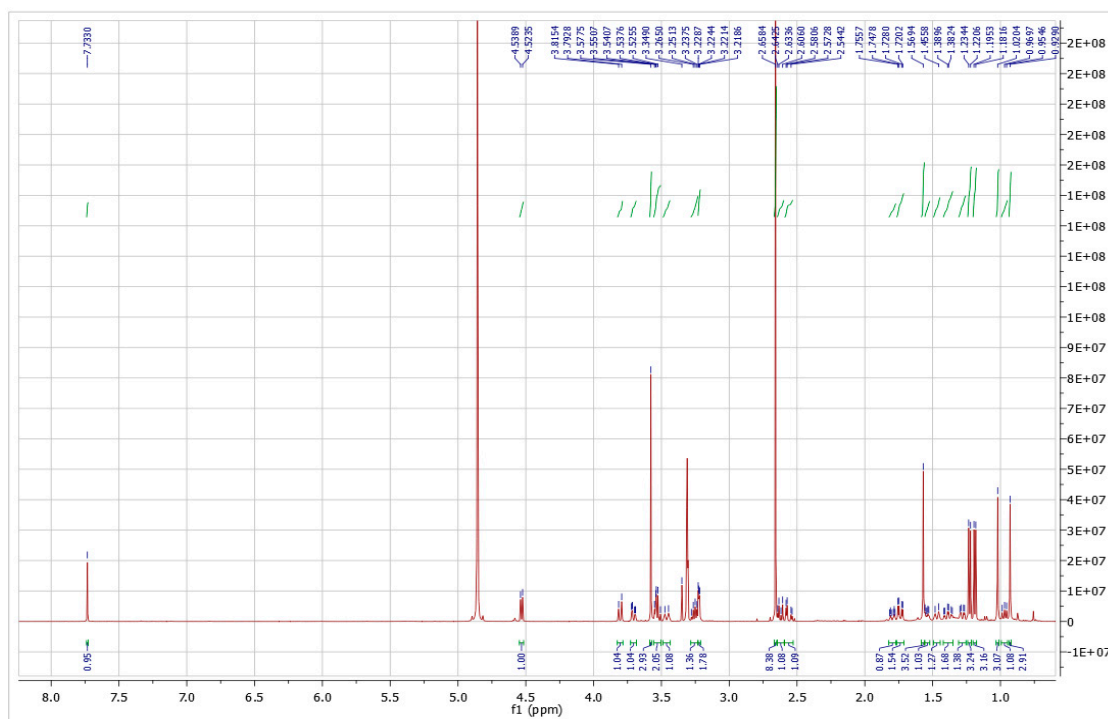

Figure S1.  $^1\text{H}$  NMR spectrum of compound 1 in methanol- $d_4$  at 600 MHz.

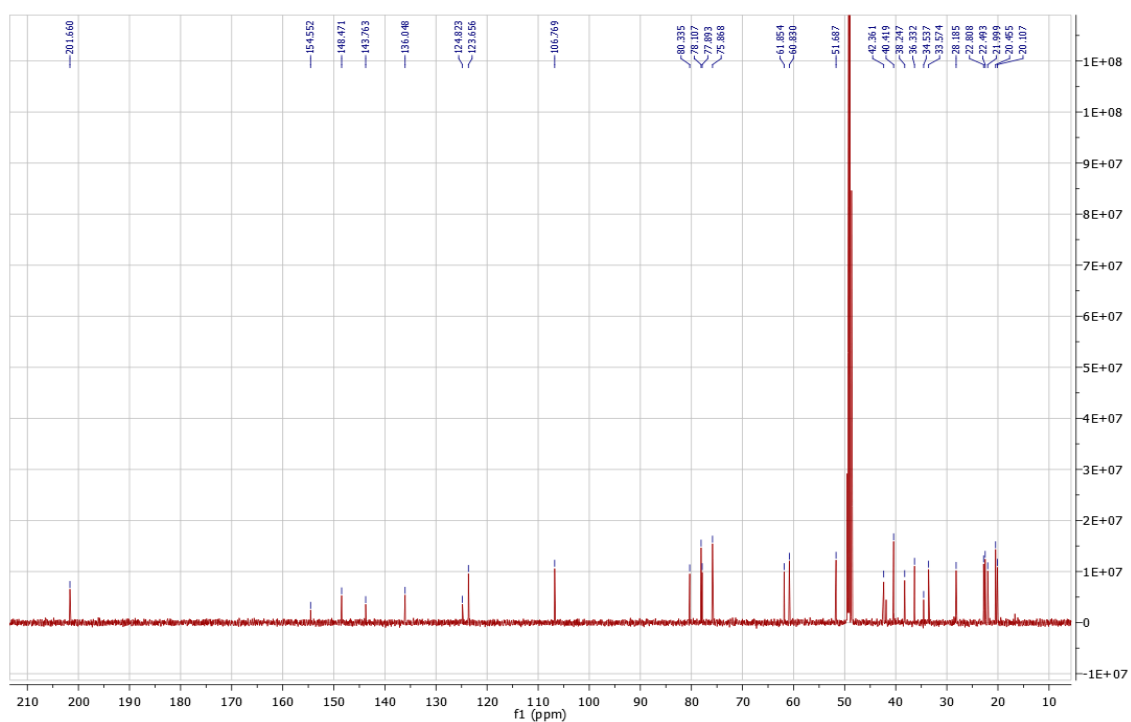

Figure S2.  $^{13}\text{C}$  NMR spectrum of compound 1 in methanol- $d_4$  at 600 MHz.

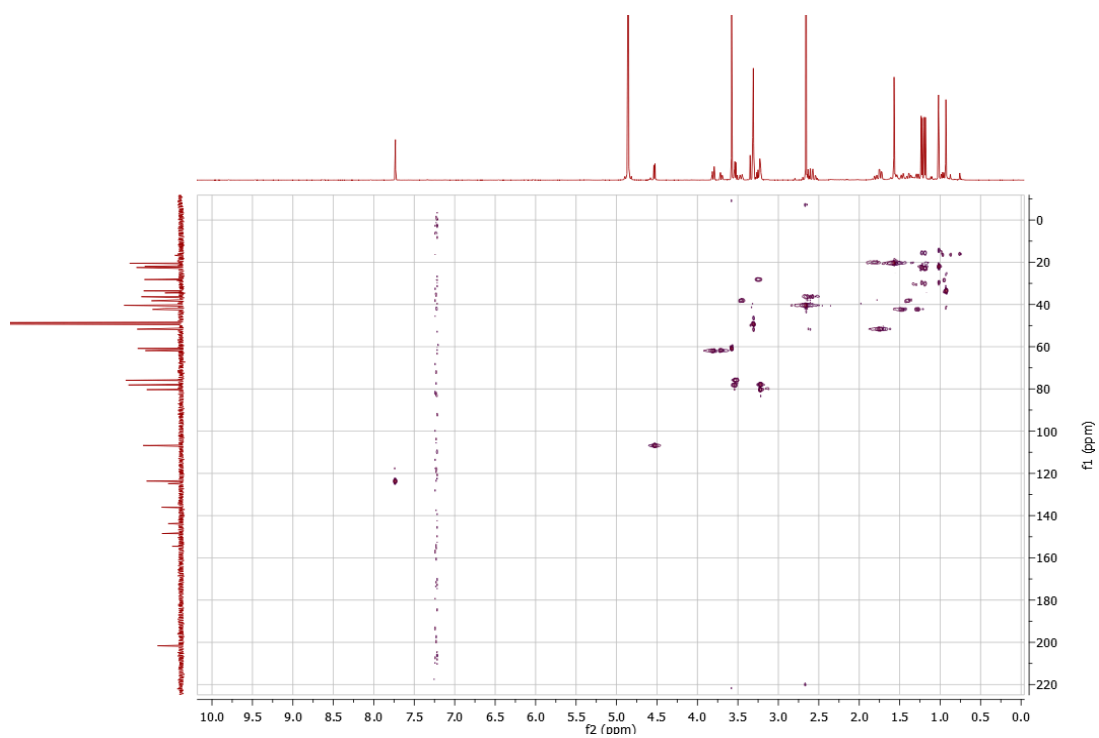

Figure S3. HSQC NMR spectrum of compound **1** in methanol-*d*<sub>4</sub> at 600 MHz.

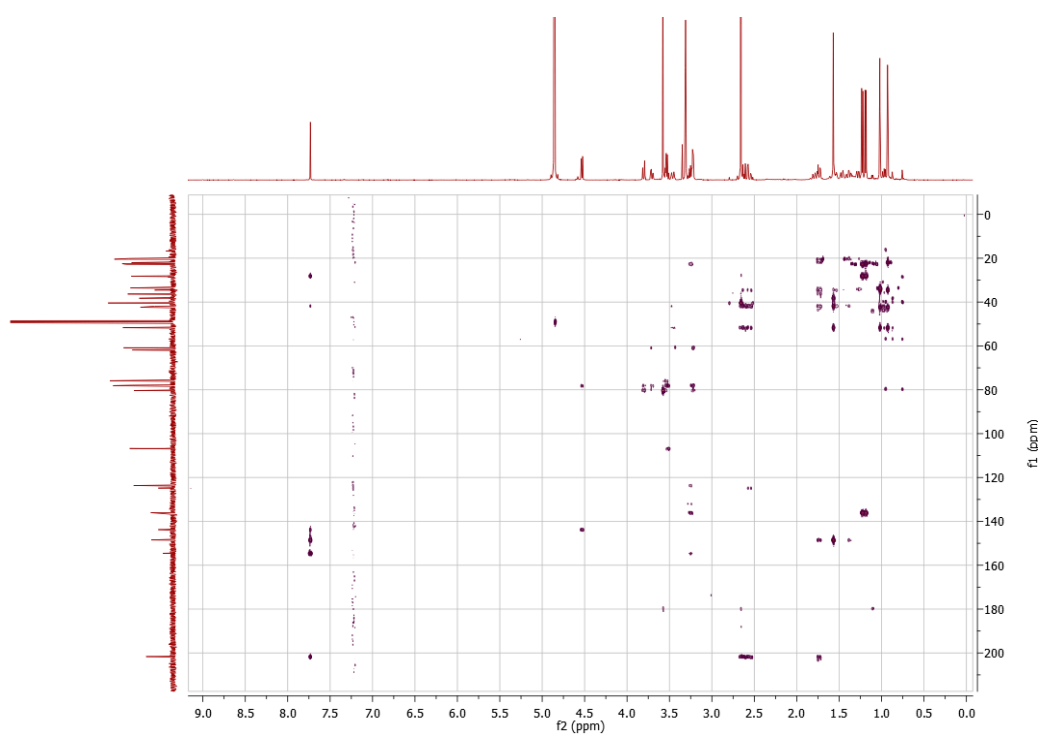

Figure S4. HMBC NMR spectrum of compound **1** in methanol-*d*<sub>4</sub> at 600 MHz.

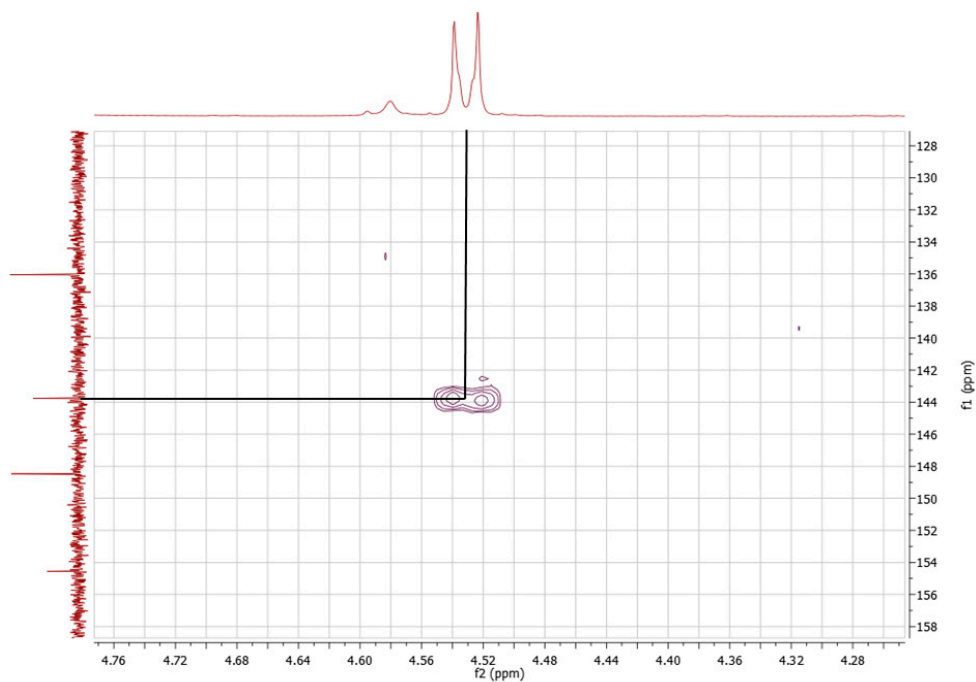

Figure S5. HMBC correlation from H-1' to C-11 of compound 1 in methanol-*d*<sub>4</sub> at 600 MHz.

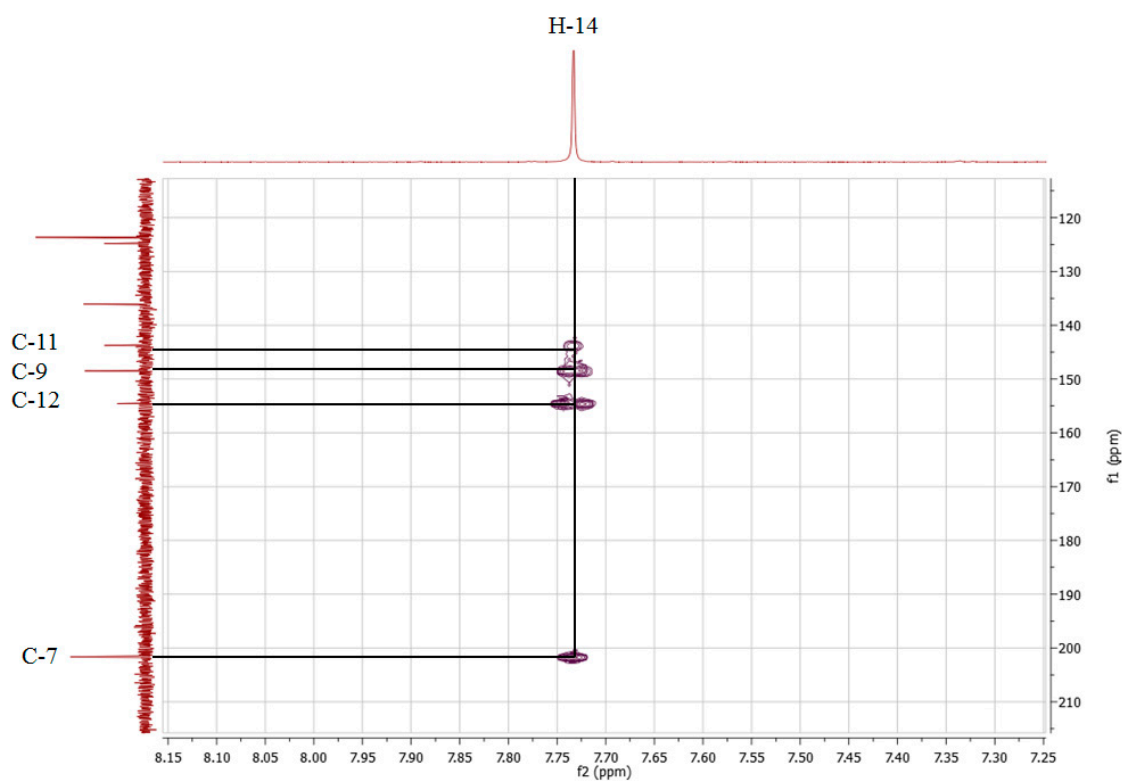

Figure S6. HMBC correlation from H-14 to C-7, C-9, C-11 and C-12 of compound 1 in methanol-*d*<sub>4</sub> at 600 MHz.

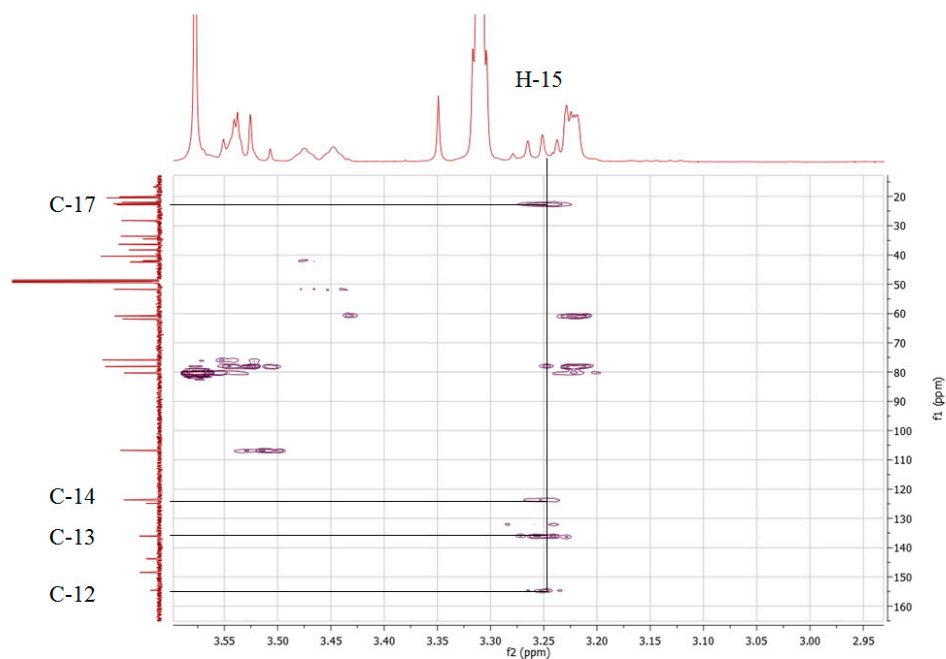

**Figure S7.** HMBC correlation from H-15 to C-12, C-13, C-14 and C-17 of compound **1** in methanol- $d_4$  at 600 MHz.

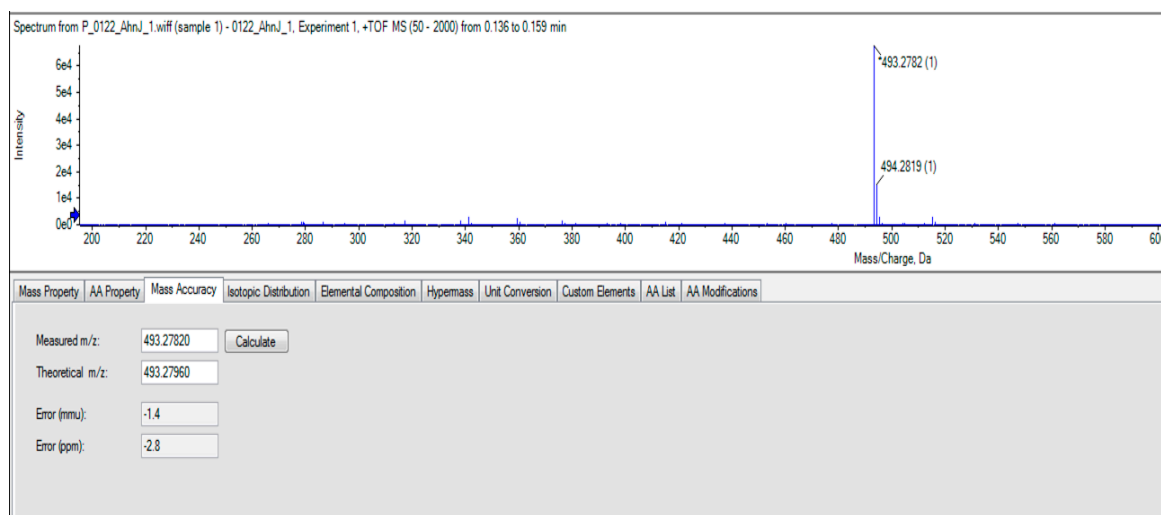

**Figure S8.** HRESIMS of compound **1** in positive mode.
